# Supplementary material for: Mutant p53 induces a hypoxia transcriptional program in gastric and esophageal adenocarcinoma
Source: JCI journal article supplement (doi:10.1172/jci.insight.128439), 2019-08-07
Supplement: sd1 [file 1]

## **SUPPLEMENTAL INFORMATION**

### **Mutant p53 Induces a Hypoxia Transcriptional Program in Gastric and Esophageal Adenocarcinoma**

**Nilay Sethi<sup>1\*</sup>, Osamu Kikuchi<sup>1\*</sup>, James McFarland<sup>2</sup>, Yanxi Zhang<sup>1</sup>, Max Chung<sup>1</sup>, Nicholas Kafker<sup>1</sup>,  
Mirazul Islam<sup>1</sup>, Benjamin Lampson<sup>1</sup>, Abhishek Chakraborty<sup>1</sup>, William Kaelin<sup>1,2,3</sup>, and Adam J. Bass<sup>1,2</sup>**

### **INVENTORY**

Supplemental Information contains the Supplemental Data (including 10 figures),

## SUPPLEMENTAL FIGURES

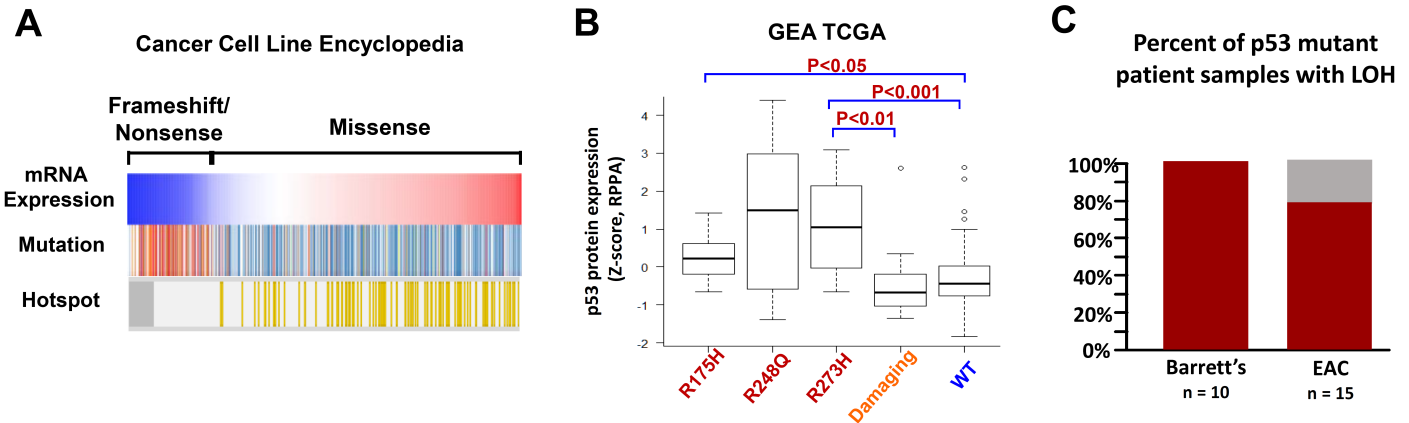**Supplemental Figure 1. p53 is frequently mutated and overexpressed in human gastroesophageal cancer**

(A) mRNA expression of *TP53* across all cell lines found in CCLE annotated by type of p53 mutation (nonsense and frameshift mutations are red and orange, respectively, and missense mutations are blue); hotspot mutation (R175C/H, R248Q/W, R273C/H, bottom panel)

(B) Box plot showing protein expression levels of p53 in TCGA gastric cancer patients annotated by p53 mutation status. Damaging mutation include Nonsense or frameshift in earlier codons (<175). P-values are of pairwise comparison using Wilcoxon rank-sum test with Bonferroni correction.

(C) Percent of patients with p53 mutant Barrett's Esophagus or Esophageal Adenocarcinoma that exhibit loss of heterozygosity (LOH)

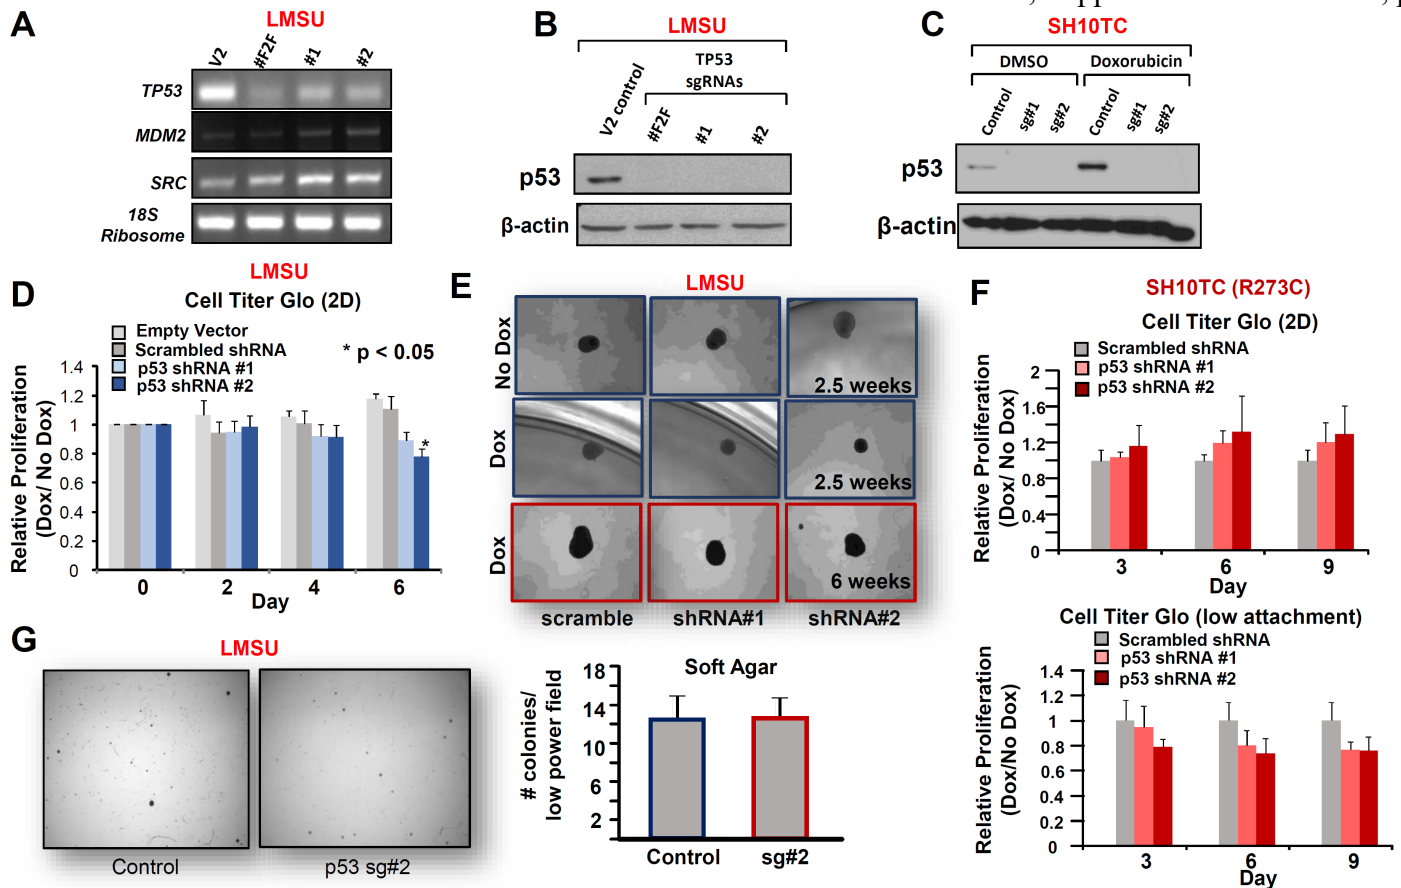

## Supplemental Figure 2. Mutant p53 is expendable for primary tumor properties of gastroesophageal cancer cells

**(A)** RT-PCR showing cDNA expression levels of *TP53*, *MDM2*, *SRC*, and *18S Ribosome* (loading control) in LMSU gastric adenocarcinoma cell line, which harbors an endogenous R175H p53 mutation, stably expressing a Cas9 control vector (V2) or three distinct targeting sgRNAs in addition to Cas9.

**(B)** Immunoblot showing protein expression levels of p53 in LMSU gastric cancer cells expressing a Cas9 control vector (V2) or three distinct targeting sgRNAs in addition to Cas9.

**(C)** Immunoblot showing protein expression levels of p53 in SH10TC esophageal adenocarcinoma cells (R273C) expressing a Cas9 control vector (V2) or two distinct targeting sgRNAs in addition to Cas9 in the presence or absence of doxorubicin.

**(D)** Proliferation of LMSU gastric adenocarcinoma cells (R175H) expressing an inducible vector control, scrambled control, or two targeting shRNAs shown as a ratio of with doxycycline/without doxycycline using CellTiterGlo.

**(E)** Low-attachment colony formation assay of LMSU gastric adenocarcinoma cells (R175H) expressing a scrambled control, or two targeting shRNAs at 2.5 weeks and 6 weeks.

**(F)** Proliferation of SH10TC esophageal adenocarcinoma cells (R273C) expressing a constitutive vector control or two *TP53* targeting shRNAs shown as a ratio of with doxycycline/without doxycycline using CellTiterGlo on adherent (top panel) and low attachment culture (bottom panel).

**(G)** Soft agar colony formation assay of LSMU gastric adenocarcinoma cells (R175H) expressing a control or p53 targeting sgRNA with representative images (left panel) and quantification (right panel).

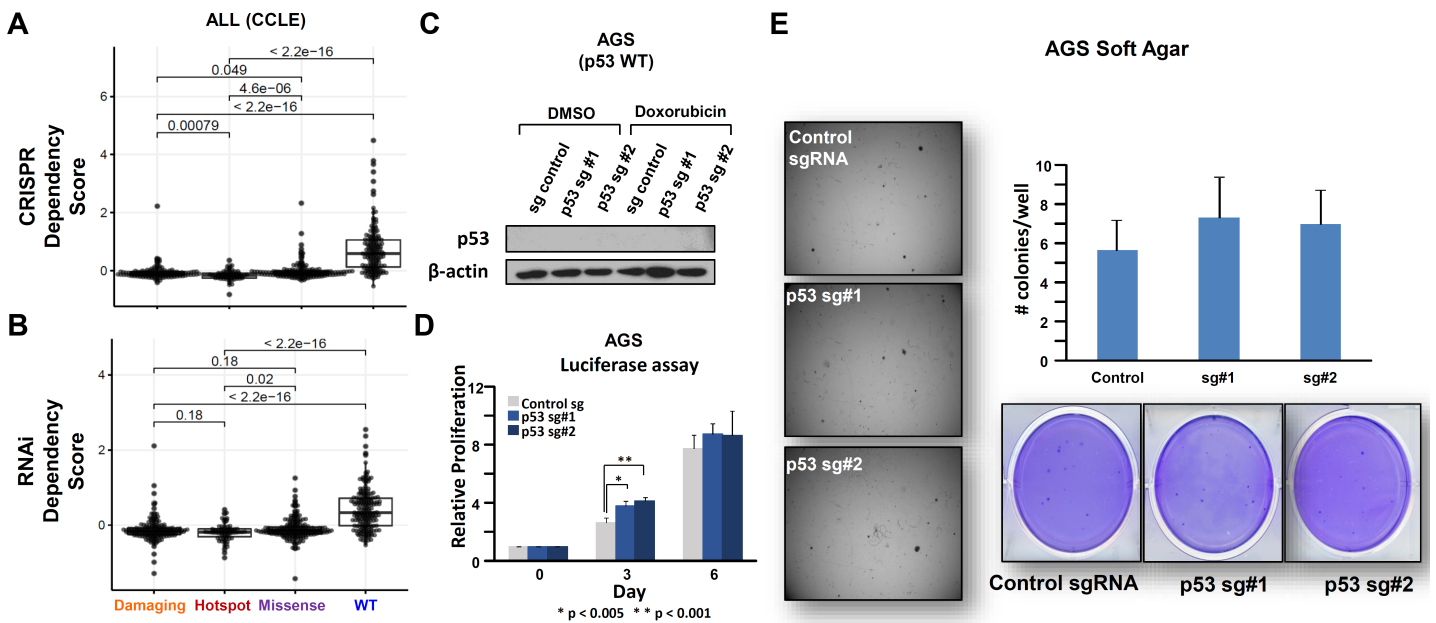

### Supplemental Figure 3. Deletion of WT p53 in AGS gastric cancer cell line does not impact primary tumor growth properties

*TP53* dependency scores for all CCLE cell lines with damaging (nonsense/frameshift) mutations, hotspot (R175H, R248Q/W, R273C/H) mutations, missense mutations, or wildtype for *TP53* using (A) CRISPR and (B) RNAi dependency data.

(C) Immunoblot showing WT p53 protein expression in AGS gastric adenocarcinoma cells expressing a Cas9 control vector (V2) or two distinct p53 targeting sgRNAs in addition to Cas9 in the presence or absence of doxorubicin.

(D) Proliferation of AGS-luciferase labelled cells expressing a control or two distinct p53 sgRNAs by luciferase assay

(E) Soft agar colony formation assay of AGS gastric adenocarcinoma cells expressing a control or two distinct p53 targeting sgRNAs as shown by representative phase contrast images (left panel), quantification of colonies (top right panel), and crystal violet staining.

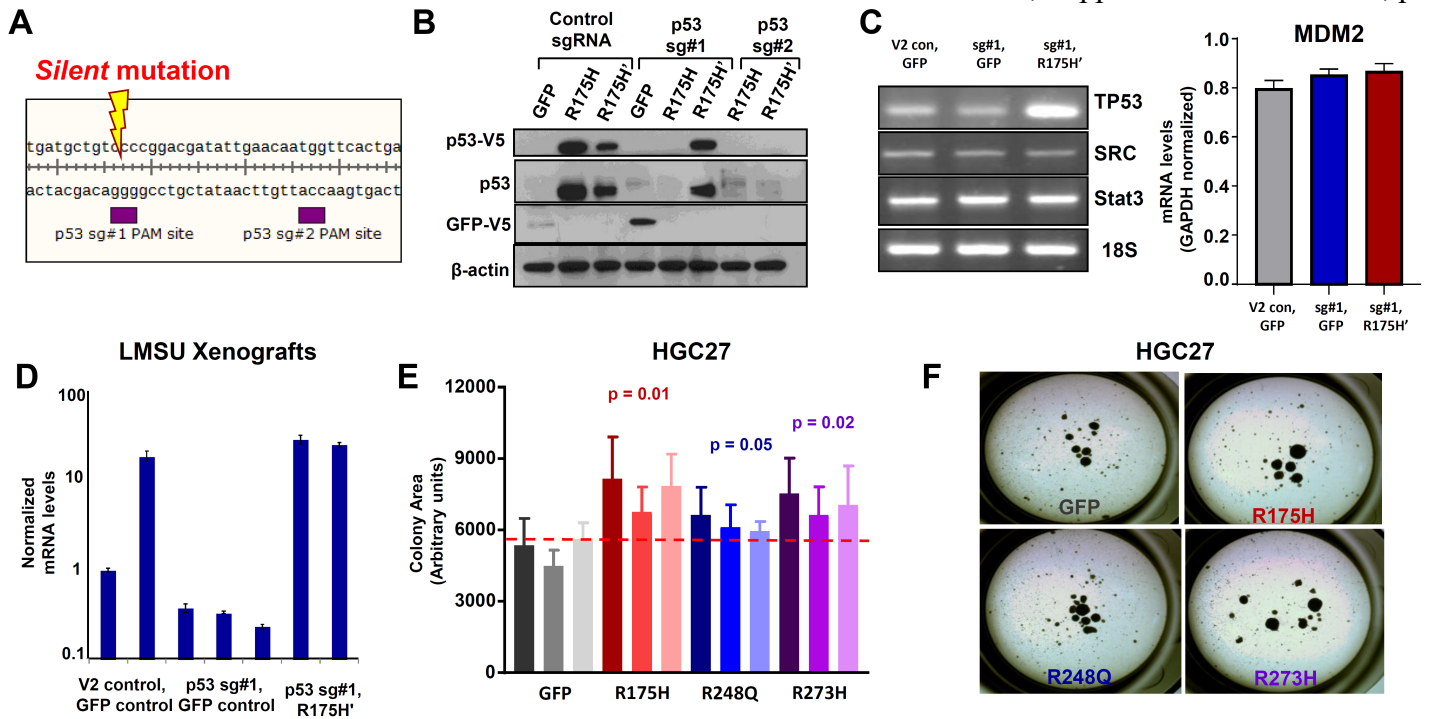

### Supplemental Figure 4. Overexpression of mutant p53 promotes primary tumor growth in gastric cancer

(A) Design of sgRNAs against TP53. Mutant p53-R175H' contains the silent point mutation in sgRNA#1 PAM site and is insensitive to TP53 sgRNA#1-mediated DNA editing.

(B) Immunoblot showing control, sgRNA#1 and sgRNA#2 activity in GEA cells overexpressing GFP, R175H or R175H' (with silent mutation).

(C) cDNA expression levels of *TP53*, *SRC*, *STAT3* and *18S Ribosome* (loading control) of LMSU cells with sgTP53 and/or R175H' ORF by PCR. *MDM2* mRNA expression levels by RT-PCR in the same samples.

(D) Mutant R175H *TP53* gene expression in GFP, V2 control, GFP, p53 sg#1, and p53 sgRNA#1, R175H' OE primary tumor xenografts

(E) Quantification of colony area from HGC27 gastric cancer cells expressing either GFP control or indicated mutant p53 isoforms cultured under ultra-low attachment conditions. p-values calculated by Student's t-test of three biological replicates

(F) Representative images of ultra-low attachment colonies from (E)

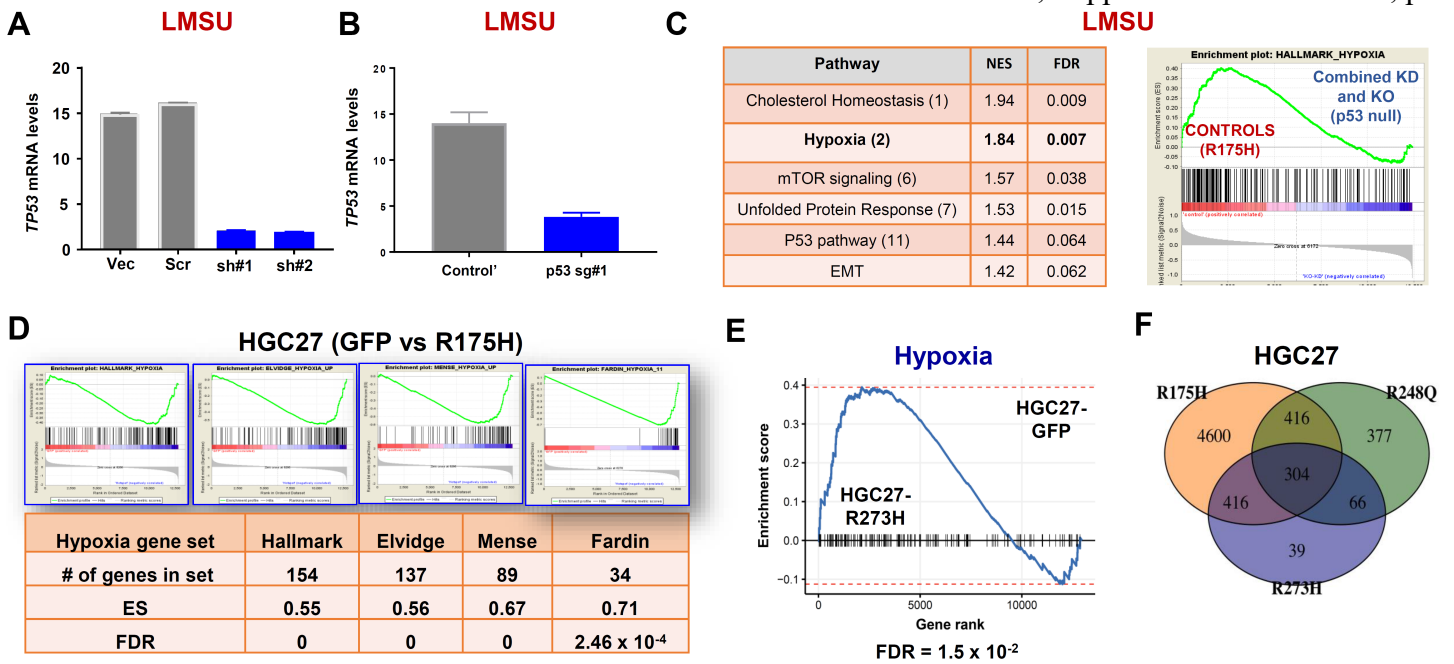

### Supplemental Figure 5. Mutant p53 regulates a hypoxia transcriptional program in gastric cancer cells

(A) mRNA expression of *TP53* in LMSU cells expressing either vector control, scrambled shRNA control, p53 shRNA#1, or p53 shRNA#2.

(B) mRNA expression of *TP53* in LMSU cells with control or sgRNA #1 against TP53

(C) Gene set enrichment analysis (GSEA) of mRNA sequencing data: Table of pathways enriched in p53-R175H expressing LMSU cells compared to knockdown controls (left panel) and GSEA plot for Hallmark hypoxia (right panel)

(D) GSEA analysis of distinct validated hypoxia gene-sets in HGC27 cells expressing p53-R175H compared to controls: GSEA plots (top panel); Table of hypoxia gene-set details (bottom panel)

(E) GSEA plot of Hallmark hypoxia signature in R273H-expressing HGC27 cells versus GFP controls

(F) Venn-diagram of differentially expressed genes in HGC27 cells expressing the indicated mutant p53 compared to GFP controls

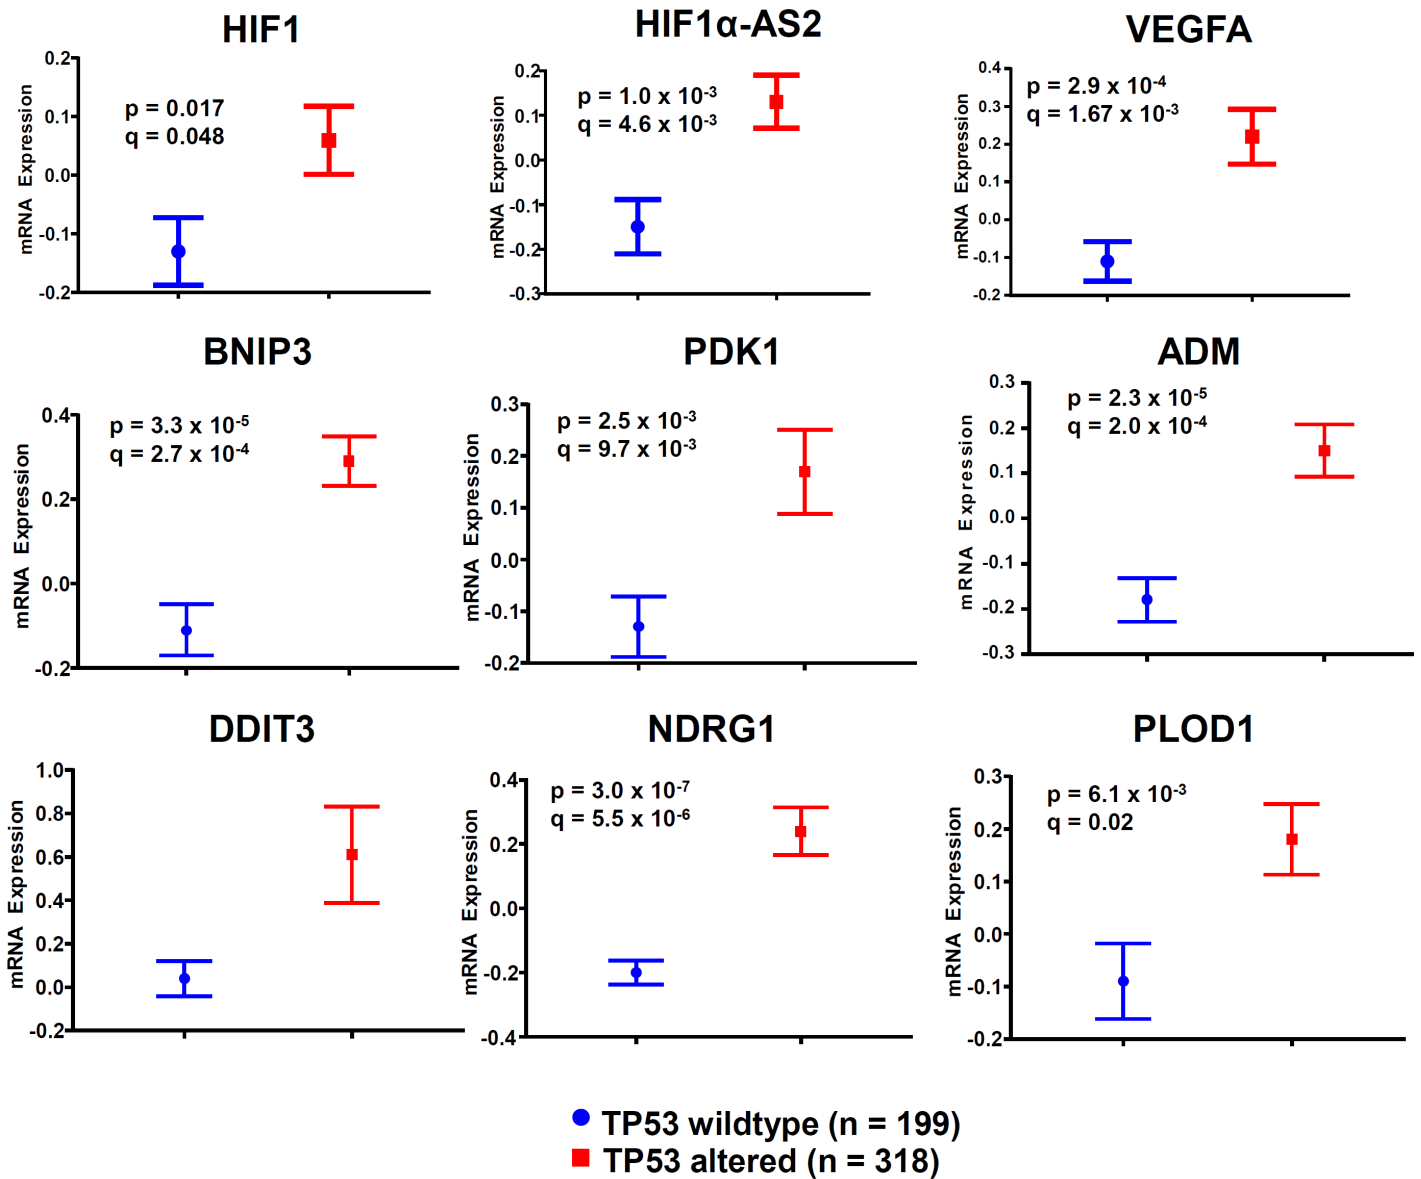

**Supplemental Figure 6. *TP53* alterations are associated with induction of hypoxia genes in human gastric cancer**

Expression levels of select hypoxia genes in patients with *TP53* altered (n=318) or wildtype (n=199) gastric cancer



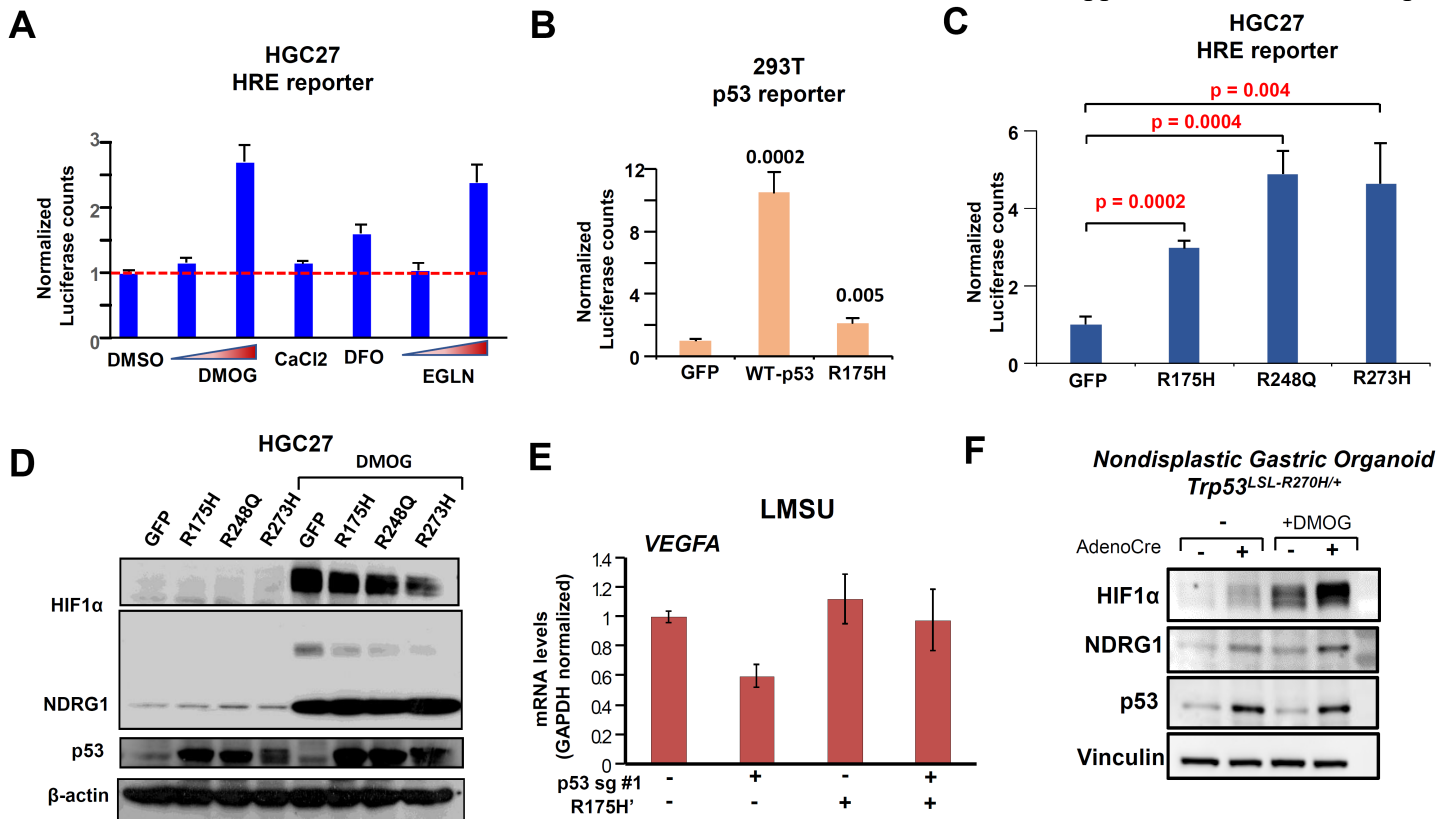

### Supplemental Figure 7. Mutant p53 activates hypoxia genes in gastric cancer cells *in vitro*

- (A) HRE reporter luciferase activity in HGC27 cells treated with indicated chemical agents. Luciferase activity was calculated as a ratio of Firefly luciferase counts (HRE) divided by constitutive renilla luciferase counts.
- (B) p53 reporter luciferase assay of HEK293T cells co-transfected with GFP control, wildtype p53, or mutant R175H. Luciferase activity was calculated as firefly luciferase counts (p53 reporter) divided by constitutive renilla luciferase counts.
- (C) HIF-responsive promoter (HRE) firefly luciferase reporter activity in HGC27 cells transiently transfected with indicated mutant p53 constructs; 1 mM DMOG treatment was used as a positive control. Data were normalized to co-transfected constitutively active Renilla luciferase activity. Results are shown as the average  $\pm$  SD.
- (D) Immunoblot showing HIF1 $\alpha$ , NDRG1, and mutant p53 protein levels in HGC27 cells with and without 1mM DMOG treatment.
- (E) Gene expression levels of *GAPDH*-normalized *VEGFA* levels in LMSU cells with indicated p53-R175H' and/or p53 sgRNA#1 expression.
- (F) Protein expression of HIF-1 $\alpha$  and p53 in conditional *Trp53<sup>LSL-R270H/+</sup>* gastric organoids with and without AdenoCre virus (AdCre) in the presence or absence of DFO or DMOG by immunoblot.

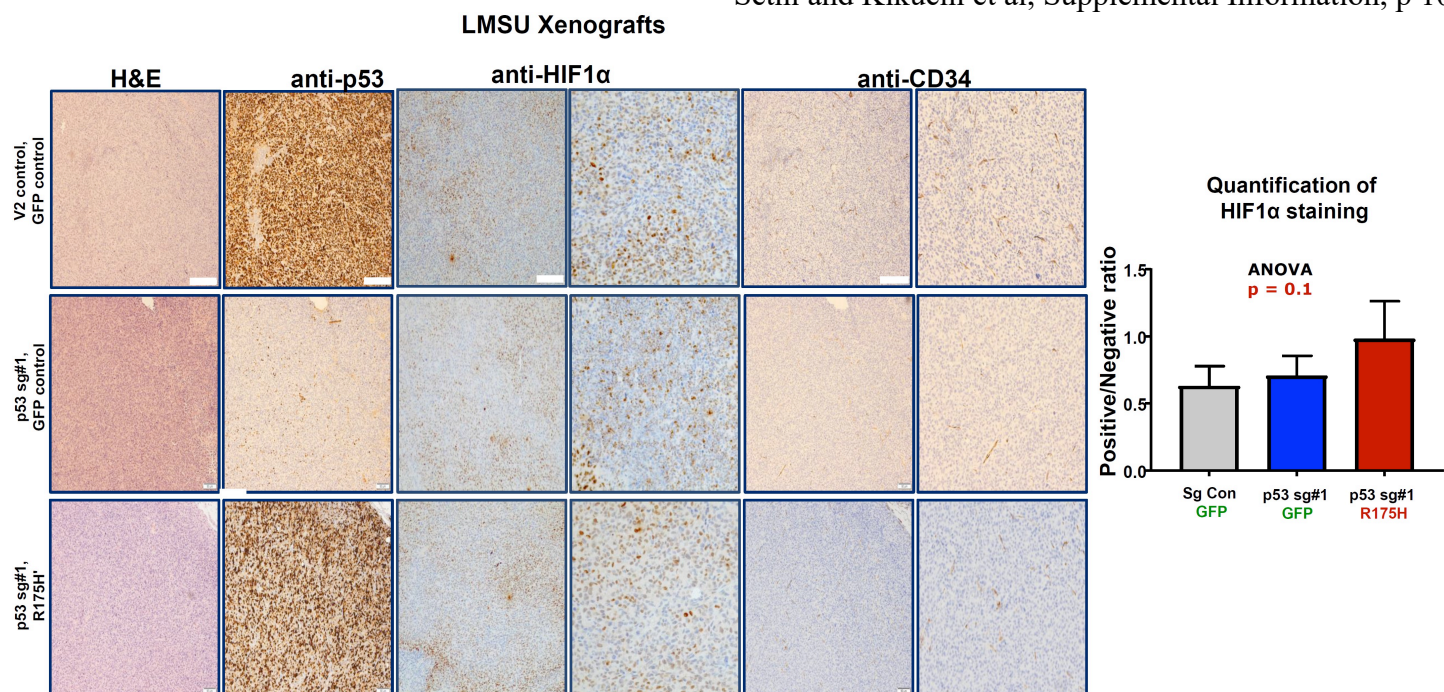

**Supplemental Figure 8. Enforced expression of mutant p53 is associated with elevated HIF1 $\alpha$  levels in gastric cancer primary tumor xenografts**

Histological and immunohistochemical analysis of LMSU xenograft tumors expressing indicated control, p53 sgRNA, and p53-R175H'OE. Panels from left to right show representative images of H&E staining, p53 immunohistochemistry (IHC), HIF-1 $\alpha$  IHC, and CD34 IHC. Scale bar, 100  $\mu$ m.

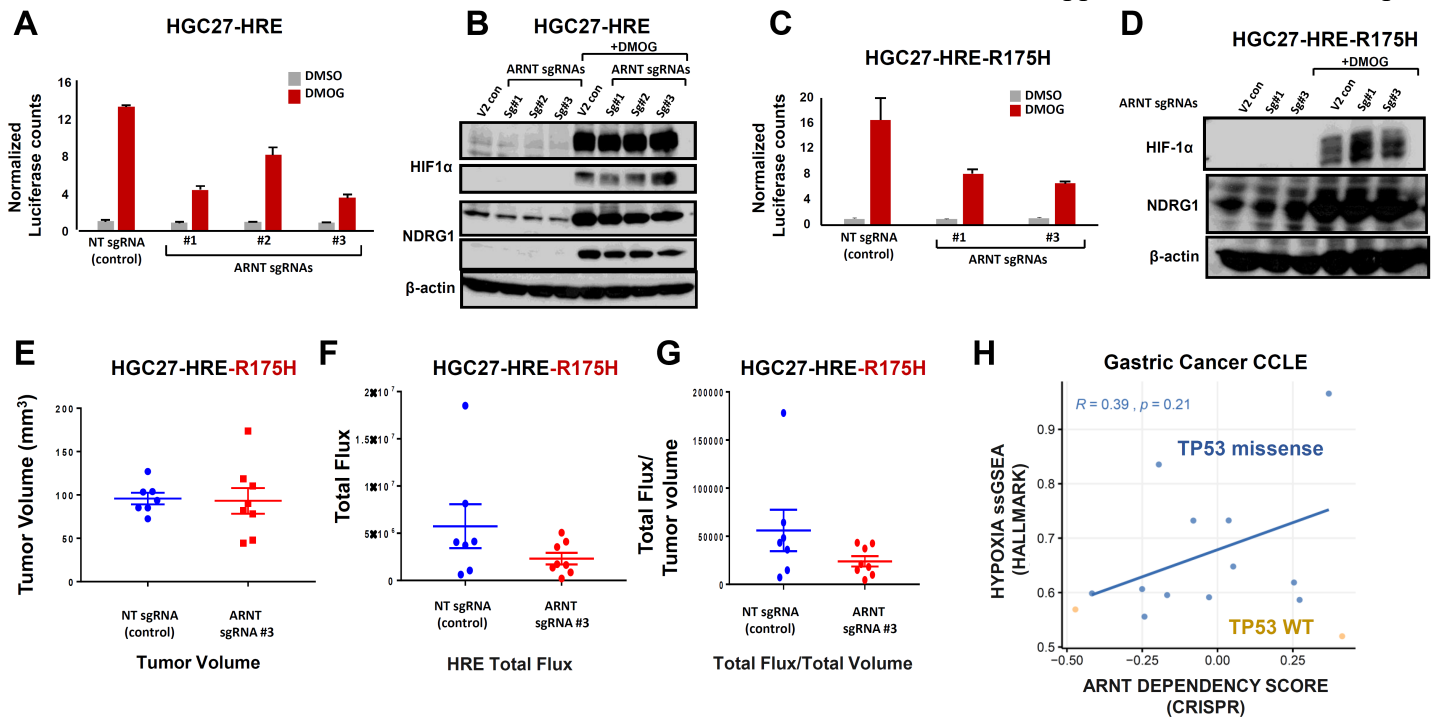

**Supplemental Figure 9. Inhibition of HIF co-factor ARNT does not impact primary tumor growth of mutant p53 gastric cancer**

(A) Luciferase assay of HGC27-HRE cells stably expressing either control or ARNT sgRNAs in the presence and absence of 1 mM DMOG.

(B) Immunoblot of HIF-1 $\alpha$  and NDRG1 expression levels in HGC27-HRE cells stably expressing either control or ARNT sgRNAs in the presence and absence of 1 mM DMOG. The top band is a darker exposure whereas the bottom band is a lighter exposure for HIF-1 $\alpha$  and NDRG1.

(C) Luciferase assay of HGC27-HRE-R175H cells stably expressing either control or ARNT sgRNAs in the presence and absence of 1 mM DMOG.

(D) Immunoblot of HIF-1 $\alpha$  and NDRG1 expression levels in HGC27-HRE-R175H cells stably expressing either control or ARNT sgRNAs in the presence and absence of 1 mM DMOG

(E) Tumor volume of HGC27-HRE-R175H expressing control or ARNT sgRNA#3 xenografts at 2-week time point

(F) Total HRE Flux of HGC27-HRE-R175H expressing control or ARNT sgRNA#3 xenografts at 2-week time point

(G) Total flux (HRE-reporter activity) to tumor volume ratio of HGC27-HRE-R175H expressing control or ARNT sgRNA#3 xenografts at 2-week time point

(H) Scatter plot showing the association between ARNT CRISPR dependency and Hypoxia GSEA in gastric cancer cell lines annotated by TP53 mutation status

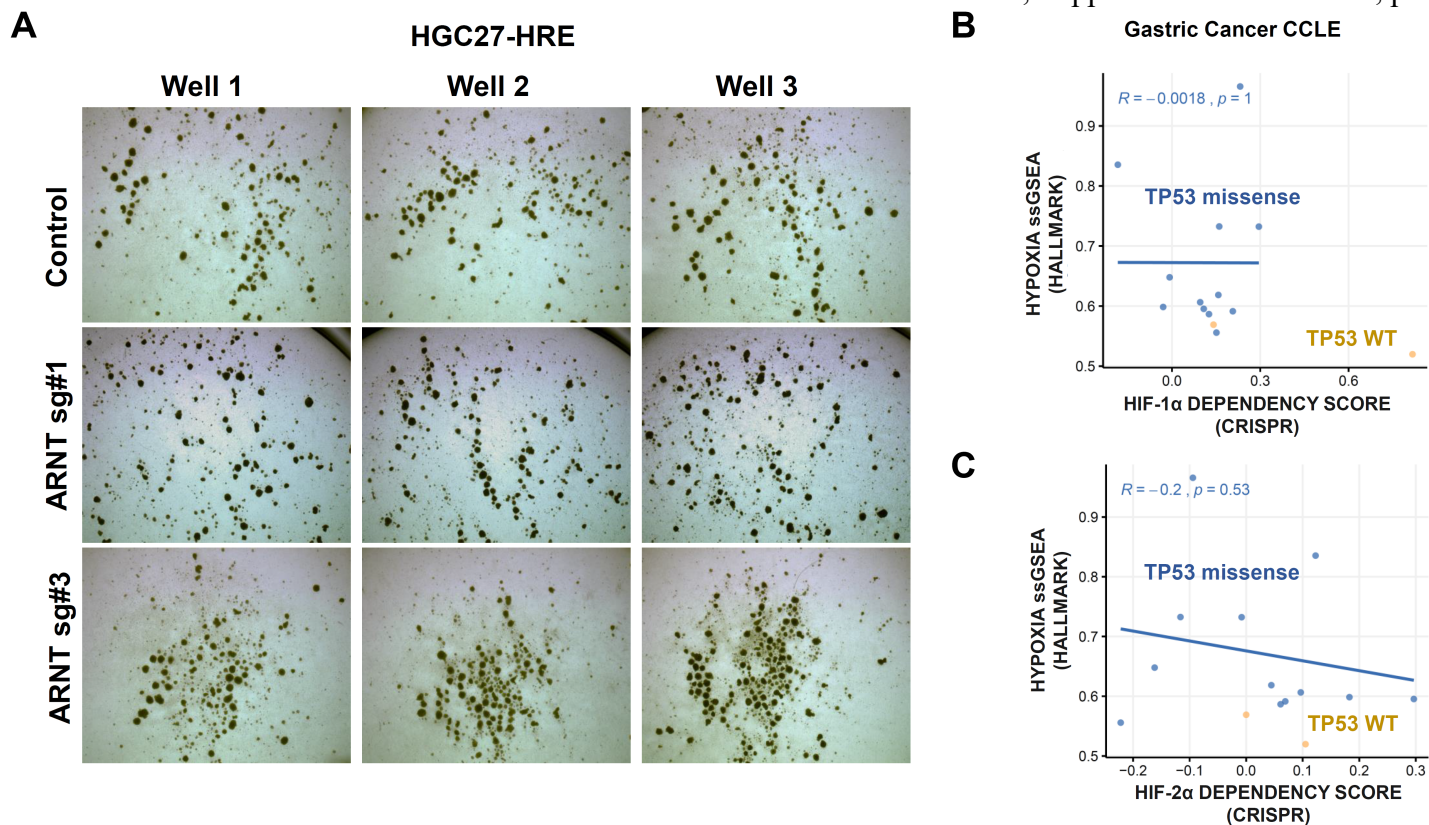

**Supplemental Figure 10. ARNT is not required for ultra-low attachment culture of mutant p53 gastric cancer cells**

(A) Representative images of ultra-low attachment colonies of HGC27-HRE-R175H cells expressing either control or two distinct ARNT sgRNAs.

(B) Scatter plot showing the association between HIF1 $\alpha$  CRISPR dependency and Hypoxia GSEA in gastric cancer cell lines annotated by *TP53* mutation status

(C) Scatter plot showing the association between HIF2 $\alpha$  CRISPR dependency and Hypoxia GSEA in gastric cancer cell lines annotated by *TP53* mutation status
